# Supplementary material for: Tailored exercise and manual therapy versus standardised exercise for patients with shoulder subacromial pain: a feasibility randomised controlled trial (the Otago MASTER trial)
Source: HighWire-hosted journal article supplement (doi:10.1136/bmjopen-2021-053572), 2022-06-01
Supplement: bmjopen-2021-053572supp002_data_supplement.pdf [file bmjopen-2021-053572supp002_data_supplement.pdf]

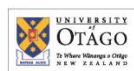

Centre for Health, Activity,  
and Rehabilitation Research

## Supplementary material 2

### The Otago MASTER Trial

Authors: Daniel Cury Ribeiro, Zohreh Tangrood Jafarian, Ross Wilson, Gisela Sole, J. Haxby Abbott

Below, we present two tables, showing findings for within- and between-group comparisons.

Please note these are estimates from a feasibility trial and should not be used for interpreting effectiveness of interventions included in the trial.

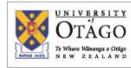

Centre for Health, Activity,  
and Rehabilitation Research

Table S1. Within-group differences (estimated marginal means and 95% confidence intervals).

| Outcome                                  | Baseline vs 4 weeks       |                          | Baseline vs 8 weeks      |                          | Baseline vs 12 weeks     |                            |
|------------------------------------------|---------------------------|--------------------------|--------------------------|--------------------------|--------------------------|----------------------------|
|                                          | Standardized              | Tailored                 | Standardized             | Tailored                 | Standardized             | Tailored                   |
| <b>Pain at rest <sup>Ω</sup></b>         | 0.9<br>(0.1 to 1.6)       | 1.0<br>(0.2 to 1.7)      | 1.3<br>(0.5 to 2.0)      | 2.0<br>(1.3 to 2.7)      | 1.3<br>(0.5 to 2.0)      | 2.0<br>(1.3 to 2.7)        |
| <b>Pain during movement <sup>Ω</sup></b> | 3.6<br>(2.6 to 4.5) *     | 2.8<br>(1.9 to 3.8) *    | 4.2<br>(3.3 to 5.2) *    | 4.0<br>(3.1 to 4.9) *    | 4.0<br>(3.1 to 5.0) *    | 4.4<br>(3.5 to 5.3) *      |
| <b>Pain last week <sup>Ω</sup></b>       | 2.0<br>(1.2 to 3.0) *     | 2.3<br>(1.4 to 3.2) *    | 2.5<br>(1.6 to 3.4) *    | 3.3<br>(2.4 to 4.2) *    | 2.8<br>(1.9 to 3.7) *    | 3.4<br>(2.5 to 4.2) *      |
| <b>PSFS <sup>#</sup></b>                 | -2.1<br>(-3.4 to -0.7)    | -2.6<br>(-4.0 to -1.3) * | -2.7<br>(-4.1 to -1.4) * | -3.7<br>(-5.0 to -2.3) * | -2.3<br>(-3.6 to -0.9)   | -3.0<br>(-4.3 to -1.7) *   |
| <b>SPADI Pain <sup>Ω</sup></b>           | 35.8<br>(28.2 to 43.5)    | 35.2<br>(27.7 to 42.7)   | 31.7<br>(24.1 to 39.4)   | 34.6<br>(27.3 to 41.9)   | 35.9<br>(28.2 to 43.6)   | 34.6<br>(27.3 to 41.9)     |
| <b>SPADI Disability <sup>Ω</sup></b>     | 12.4<br>(6.0 to 18.8)     | 9.7<br>(3.5 to 15.9)     | 17.2<br>(10.7 to 23.6)   | 21.7<br>(15.7 to 27.8)   | 18.3<br>(11.9 to 24.8)   | 21.2<br>(15.1 to 27.2)     |
| <b>SPADI Total <sup>Ω</sup></b>          | 16.02<br>(10.2 to 21.8) * | 13.1<br>(7.5 to 18.7)    | 22.6<br>(16.9 to 28.4) * | 26.7<br>(21.3 to 32.1) * | 25.0<br>(19.2 to 30.7) * | 26.3<br>(20.9 to 31.8) *   |
| <b>Pain Self-efficacy <sup>#</sup></b>   | -3.6<br>(-6.8 to 0.4)     | -7.0<br>(-10.1 to -3.9)  | -5.2<br>(-8.4 to -2.0)   | -11.1<br>(-14.1 to -8.0) | -6.2<br>(-9.4 to -3.0)   | -12.4<br>(-15.5 to -9.4) * |

Ω = Positive differences indicate clinical improvement. # = Negative differences indicate clinical improvement.

\*: within-group change greater than the minimal clinically important difference.



Centre for Health, Activity,  
and Rehabilitation Research

Table S2. Estimated marginal means and standard error for each group, and between-group estimated marginal mean differences and their respective 75% confidence intervals.

| Outcome                               | 4 weeks                |                    |                         | 8 weeks                |                    |                       | 12 weeks               |                    |                         |
|---------------------------------------|------------------------|--------------------|-------------------------|------------------------|--------------------|-----------------------|------------------------|--------------------|-------------------------|
|                                       | Standardized<br>(n=15) | Tailored<br>(n=13) | Mean difference         | Standardized<br>(n=15) | Tailored<br>(n=13) | Mean difference       | Standardized<br>(n=15) | Tailored<br>(n=13) | Mean difference         |
| <b>Pain at rest #</b>                 | 0.8<br>(0.2)           | 1.3<br>(0.2)       | -0.5<br>(-0.9 to -0.2)  | 0.4<br>(0.2)           | 0.3<br>(0.2)       | 0.1<br>(-0.3 to 0.4)  | 0.4<br>(0.2)           | 0.3<br>(0.2)       | 0.1<br>(-0.3 to 0.4)    |
| <b>Pain during movement #</b>         | 1.5<br>(0.4)           | 2.6<br>(0.4)       | -1.1<br>(-1.8 to -0.5)  | 0.9<br>(0.4)           | 1.5<br>(0.4)       | -0.6<br>(-1.3 to 0.0) | 1.0<br>(0.4)           | 1.1<br>(0.4)       | 0.0<br>(-0.7 to 0.6)    |
| <b>Pain last week #</b>               | 1.9<br>(0.3)           | 2.0<br>(0.2)       | -0.1<br>(-0.5 to 0.3)   | 0.4<br>(0.3)           | 1.0<br>(0.2)       | 0.4<br>(-0.1 to 0.8)  | 1.1<br>(0.3)           | 0.9<br>(0.2)       | 0.2<br>(-0.2 to 0.6)    |
| <b>PSFS<sup>Ω</sup></b>               | 7.0<br>(0.6)           | 7.0<br>(0.6)       | 0.1<br>(-0.9 to 1.1)    | 7.6<br>(0.6)           | 8.0<br>(0.6)       | -0.3<br>(-1.3 to 0.7) | 7.2<br>(0.6)           | 7.3<br>(0.6)       | -0.1<br>(-1.1 to 0.9)   |
| <b>SPADI Pain #</b>                   | 14.0<br>(3.1)          | 17.6<br>(2.9)      | -3.6<br>(-8.6 to 1.5)   | 18.1<br>(3.1)          | 18.8<br>(2.9)      | 0.0<br>(-5.0 to 5.0)  | 13.9<br>(3.1)          | 18.8<br>(2.9)      | -4.2<br>(-9.2 to 0.8)   |
| <b>SPADI Disability #</b>             | 10.6<br>(2.6)          | 16.1<br>(2.4)      | -5.5<br>(-9.7 to -1.3)* | 5.8<br>(2.6)           | 4.8<br>(2.4)       | 1.0<br>(-3.2 to 5.1)  | 4.7<br>(2.6)           | 5.4<br>(2.4)       | -0.7<br>(-4.9 to 3.4)   |
| <b>SPADI Total #</b>                  | 14.4<br>(2.4)          | 22.9<br>(2.2)      | -5.5<br>(-9.4 to -1.6)* | 10.8<br>(2.4)          | 9.7<br>(2.2)       | 1.0<br>(-2.8 to 4.9)  | 8.4<br>(2.4)           | 10.1<br>(2.2)      | -1.6<br>(-5.5 to 2.2)   |
| <b>Pain Self-efficacy<sup>Ω</sup></b> | 54.3<br>(1.0)          | 53.7<br>(1.0)      | 0.6<br>(-1.1 to 2.3)    | 55.9<br>(1.0)          | 57.5 (0.9)         | -1.6<br>(-3.3 to 0.0) | 56.9<br>(1.0)          | 58.9<br>(0.9)      | -2.0<br>(-3.7 to -0.3)* |

Ω = Positive differences favours standardized group. # = Negative differences favours tailored group.

\*denotes differences between groups.
